# Supplementary material for: Optimization of subcritical water extraction of phenolic antioxidants from pomegranate (Punica granatum L.) peel by response surface methodology
Source: Royal Society of Chemistry journal article supplement (doi:10.1039/c7ay01475a), 2017-01-01

**Table S1** Correlation coefficient analysis between antioxidant activity and the extraction yields of phenolics from pomegranate peel obtained by subcritical water extraction under different conditions

|                             | TP       | TF       | Punicalagin | Punicalin | Ellagic acid | DPPH    |
|-----------------------------|----------|----------|-------------|-----------|--------------|---------|
| Different time              |          |          |             |           |              |         |
| TF                          | 0.965**  |          |             |           |              |         |
| Punicalagin                 | 0.736**  | 0.744**  |             |           |              |         |
| Punicalin                   | -0.715** | -0.637*  | -0.212      |           |              |         |
| Ellagic acid                | -0.807** | -0.772** | -0.330      | 0.901**   |              |         |
| DPPH                        | 0.966**  | 0.956**  | 0.717**     | -0.711**  | -0.820**     |         |
| ABTS                        | 0.983**  | 0.976**  | 0.740**     | -0.680*   | -0.823**     | 0.986** |
| Different temperature       |          |          |             |           |              |         |
|                             | TP       | TF       | Punicalagin | Punicalin | Ellagic acid | DPPH    |
| TF                          | 0.928**  |          |             |           |              |         |
| Punicalagin                 | 0.875**  | 0.869**  |             |           |              |         |
| Punicalin                   | 0.338    | 0.522    | 0.353       |           |              |         |
| Ellagic acid                | 0.333    | 0.511    | 0.288       | 0.499     |              |         |
| DPPH                        | 0.943**  | 0.907**  | 0.864**     | 0.294     | 0.552        |         |
| ABTS                        | 0.977**  | 0.895**  | 0.905**     | 0.295     | 0.360        | 0.967** |
| Different water/solid ratio |          |          |             |           |              |         |
|                             | TP       | TF       | Punicalagin | Punicalin | Ellagic acid | DPPH    |
| TF                          | 0.954*   |          |             |           |              |         |
| Punicalagin                 | 0.980**  | 0.929**  |             |           |              |         |
| Punicalin                   | 0.839    | 0.754    | 0.906*      |           |              |         |
| Ellagic acid                | 0.928*   | 0.817    | 0.972**     | 0.925*    |              |         |
| DPPH                        | 0.991**  | 0.980**  | 0.960**     | 0.809     | 0.879*       |         |
| ABTS                        | 0.958*   | 0.974**  | 0.904*      | 0.755     | 0.793        | 0.985** |

\* Significant different ( $p < 0.05$ )

\*\* Highly significant different ( $p < 0.01$ )

Fig. S1 UPLC-DAD-ESI/MSn chromatograms of pomegranate peel extracts obtained under the optimized conditions. (a) DAD chromatograms at 254 nm; (b) MS and (c) MS/MS fragments of punicalagin ( $m/z$ , 1083).

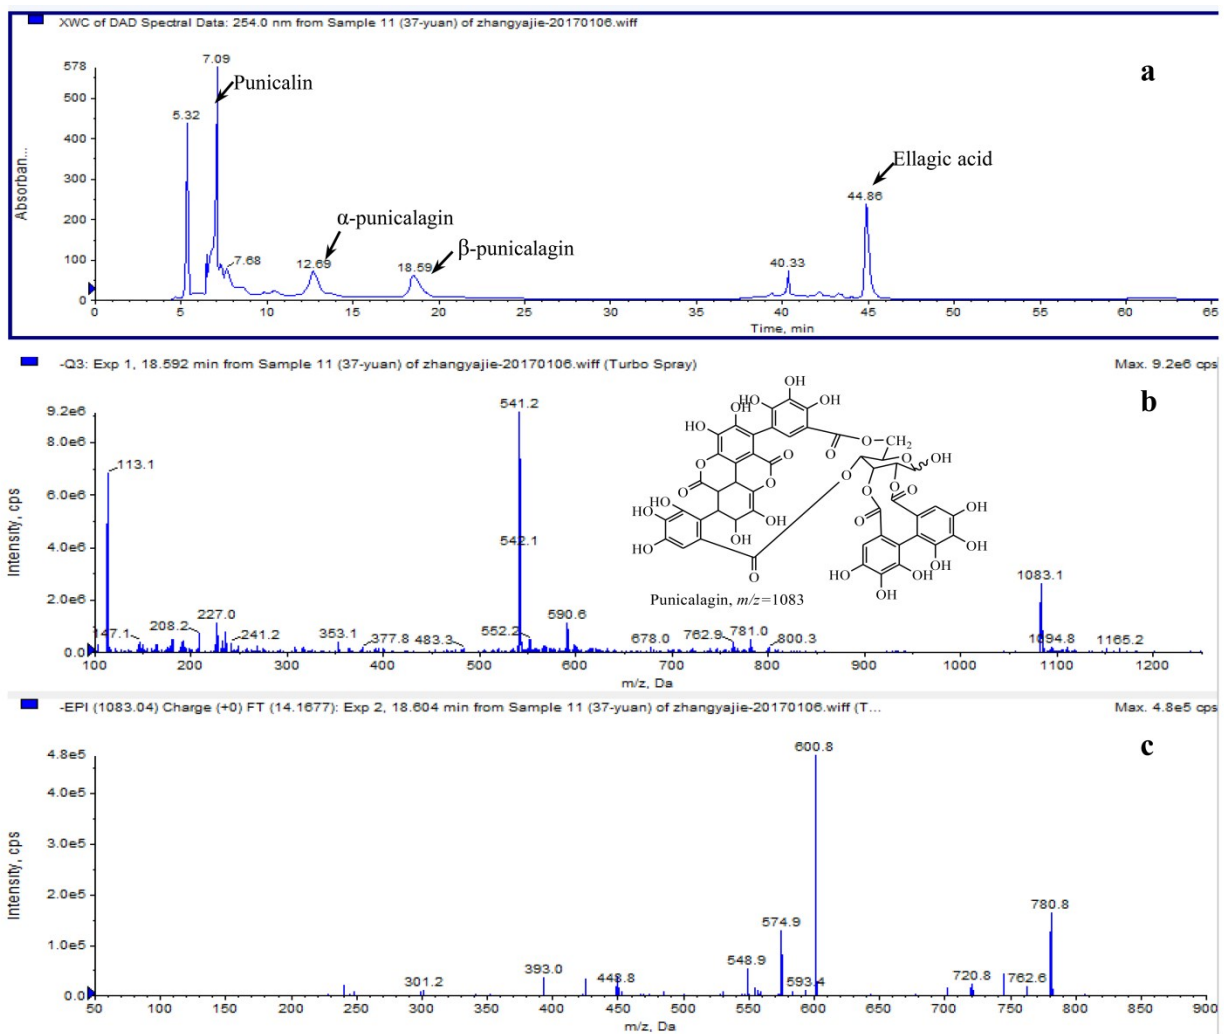

Supplement: c7ay01475a1.pdf [file c7ay01475a1.pdf]
